# Supplementary material
Source: Springer Nature journal article supplement (https://www.springermedizin.de/resource/supplementary/12911_2007_166_MOESM1_ESM.pdf/9527280)

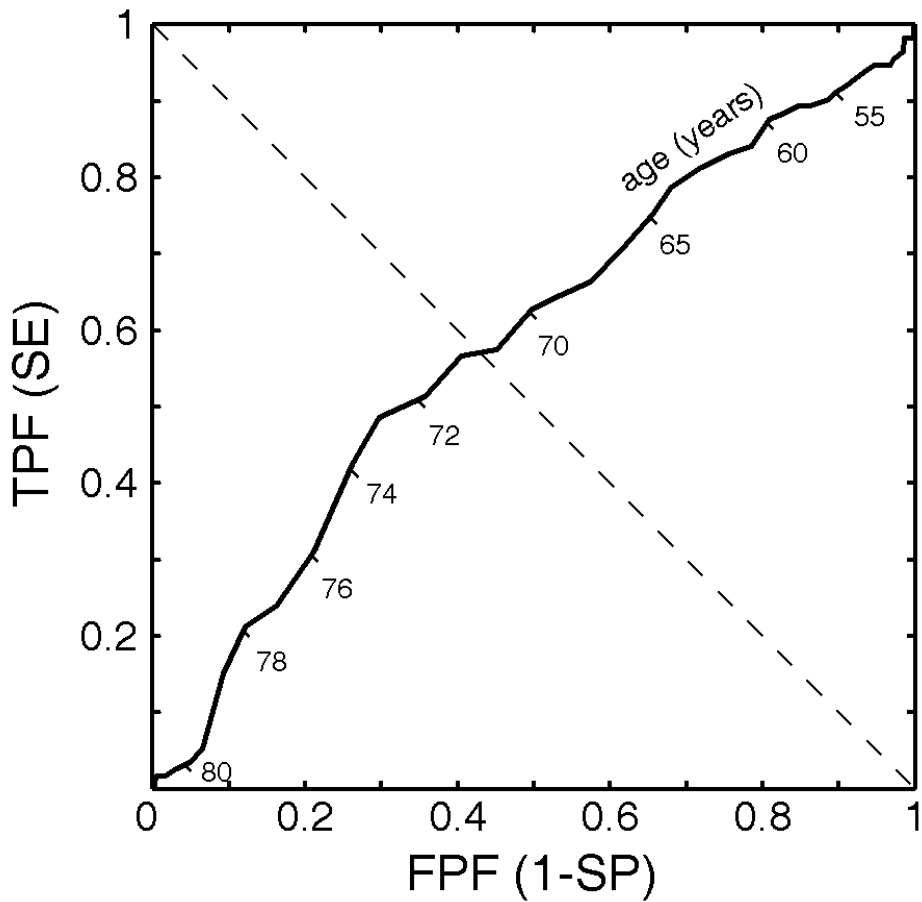

Supplement: MOESM1 [file 9527280]
